# Supplementary material for: Serine-based gemini surfactants with different spacer linkages: from self-assembly to DNA compaction
Source: Royal Society of Chemistry journal article supplement (doi:10.1039/c4sm01771d), 2014-01-01
Supplement: c4sm01771d1.pdf [file c4sm01771d1.pdf]

## Serine-based Gemini Surfactants with Different Spacer Linkages: From Self-Assembly to DNA Compaction Efficiency

S.G. Silva, I. S. Oliveira, M. L. C. do Vale and E. F. Marques\*

Centro de Investigação em Química, Department of Chemistry and Biochemistry, Faculty of Science, University of Porto, Rua do campo Alegre s/n, P 4169-007 Porto, Portugal

\*corresponding author: efmarque@fc.up.pt

### Supplementary Information

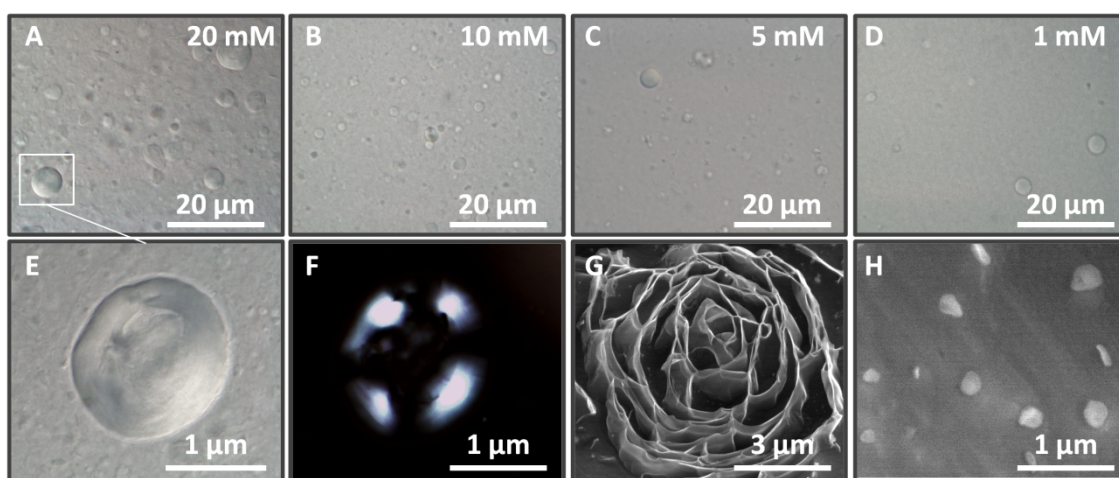

Figure: Light and Cryo-SEM micrographs for  $(12\text{Ser})_2\text{COO}12$  vesicular dispersions. A-D light microscopy images for different concentrations. E, F – Zoom of indicated region of dispersion A using normal and polarized light. G, H – Cryo-SEM images for vesicle dispersions (10 mM) showing the presence of multilamellar and unilamellar vesicles.
